# Supplementary material for: A 5:2 Intermittent Fasting Meal Replacement Diet and Glycemic Control for Adults With Diabetes: The EARLY Randomized Clinical Trial
Source: PubMed Central journal article supplement (PMC11193124; doi:10.1001/jamanetworkopen.2024.16786), 2024-06-21
Supplement: jamanetwopen-e2416786-s001.pdf [file jamanetwopen-e2416786-s001.pdf]

1  
2  
3  
4  
5  
6  
7  
8  
9  
10  
11  
12  
13  
14  
15  
16  
17  
18

# Study Protocol

**Topic name: Exploration of Treatment Models for Newly Diagnosed  
Overweight/Obese Type 2 Diabetes Mellitus**

**Source: Beijing MetabolicControl Technology Co., Ltd**

**Applicant: Guo Lixin**

**Undertaking department: Department of Endocrinology, Beijing Hospital**

## 19 **I. Research background**

20 Obesity and type 2 diabetes mellitus (T2DM) are common endocrine metabolic  
21 diseases and have become a worldwide epidemic. According to the data from IDF  
22 (International Diabetes Federation) in 2017, there were 425 million adults with  
23 diabetes worldwide, and it is estimated that by 2045, the number of people with  
24 diabetes may reach 629 million<sup>1</sup>. Epidemiological surveys in China show that the  
25 prevalence of adult diabetes is 11.6%, and China has the highest number of patients in  
26 the world. The proportion of overweight patients exceeds 40%, and the proportion of  
27 obese patients is about 25%<sup>2</sup>. Overweight and obesity not only promote the  
28 occurrence of diabetes but also are important risk factors affecting disease control in  
29 patients with T2DM. The Guidelines for the Prevention and Treatment of Type 2  
30 Diabetes in China (2017 edition) recommend that the weight loss goal for  
31 overweight/obese patients is to reduce body weight by 5%~10% within 3~6 months.  
32 Positive lifestyle interventions that control weight not only reduce the risk of new  
33 onset diabetes in high-risk populations, but also significantly improve metabolic  
34 factors such as blood glucose, lipids, and blood pressure in patients with diabetes.  
35 Studies in Daqing, Finland, and the United States have shown that intensive lifestyle  
36 interventions can significantly reduce the risk of new onset diabetes by more than 50%  
37 by effectively reducing the weight of individuals with impaired glucose tolerance  
38 (IGT)<sup>3,4</sup>. The Look AHEAD study has also confirmed that intensive dietary and  
39 exercise interventions can effectively reduce weight and significantly improve fasting  
40 blood glucose, glycosylated hemoglobin, blood pressure, lipids, insulin resistance, and  
41 inflammation in obese patients with type 2 diabetes. It is important to note that  
42 intensive dietary and exercise interventions are often very difficult to maintain. The  
43 body may adapt to fasting, leading to increased appetite and reduced energy  
44 expenditure, preventing further weight loss or even weight rebound. Therefore,  
45 patients often cannot adhere to high-intensity exercise and low-calorie diets for a long  
46 time, resulting in failed weight control. Therefore, exploring a method that allows  
47 patients to persist for a long time without causing the body to adapt becomes the

48 direction of our research.

49 To improve adherence in weight loss patients while avoiding the adaptive response  
50 caused by fasting, intermittent fasting is an alternative to low-calorie diets.  
51 Intermittent fasting refers to regular periods of no or very limited calorie intake.  
52 Common patterns include daily fasting for 16 hours, alternate-day fasting, or weekly  
53 fasting for 2 non-consecutive days. During fasting periods, calorie intake is usually  
54 between 0-25% of calorie needs. On feeding days, dietary structure can be restricted  
55 without limiting the total calorie intake, and the total calorie intake can even reach  
56 125% of normal needs<sup>5</sup>. Foreign studies have shown that intermittent fasting not only  
57 reduces the risk of diabetes in high-risk patients but also improves body weight and  
58 blood glucose control in patients with type 2 diabetes. Foreign experts have found that  
59 reducing food intake on non-fasting days by 9%-19% compared to normal  
60 requirements can lead to greater improvements in patient weight, fat mass, and blood  
61 glucose control. In addition, numerous human studies and animal experiments have  
62 confirmed that intermittent fasting also has benefits such as reducing oxidative stress  
63 and inflammation, enhancing autophagy and tissue repair ability, altering gut  
64 microbiota, and cardiovascular diseases<sup>6-9</sup>.

65 However, there is currently a lack of evaluation studies on the effectiveness and safety  
66 of intermittent fasting for overweight and obese patients with type 2 diabetes in China.  
67 The intermittent fasting pattern used in this study will involve selecting two  
68 non-consecutive days per week (such as Monday and Thursday, or Tuesday and  
69 Friday, etc.) and replacing three meals with Kang zhijun™ Cereal Fruit Meal Bag No.  
70 2 (A) (94 kcal/bag, 20g, 100g meal replacement bag A contains 17.2g protein,  
71 accounting for 29%, 19g fat, accounting for 32%, 57.6g carbohydrates, accounting for  
72 19%, and sodium 368mg). For these two days, the diet plan is one egg for breakfast +  
73 meal replacement bag A, 100g low-sugar fruit (such as cucumber, tomato, orange, etc.)  
74 + meal replacement bag A for lunch, and 200-400g leafy greens (such as spinach,  
75 cabbage, etc.) + meal replacement bag A for dinner. For the remaining five days of the  
76 week, breakfast and lunch are normal diets (low oil and low sugar recommended), and

77 dinner is replaced with Anti-Chief Jun™ Cereal Fruit Meal Bag No. 5 (B) (88  
78 kcal/bag, 20g, 100g meal replacement bag B contains 19.7 g protein, accounting for  
79 33% of energy, 11.4 g fat, accounting for 19% of energy, 63.4g carbohydrates,  
80 accounting for 21% of energy, and sodium 349mg). This study aims to intervene in  
81 overweight and obese patients with newly diagnosed type 2 diabetes using an  
82 intermittent fasting pattern and follow up to evaluate the effectiveness and safety of  
83 intermittent fasting for weight and metabolic indicators in overweight and obese  
84 patients with newly diagnosed type 2 diabetes. To explore a safer and more effective  
85 dietary intervention mode for overweight and obese patients with newly diagnosed  
86 type 2 diabetes.

87

## 88 **References**

- 89 1. Cho NH, Shaw JE, Karuranga S, et al. IDF Diabetes Atlas: Global estimates of  
90 diabetes prevalence for 2017 and projections for 2045. *Diabetes Res Clin Pract.*  
91 2018;138:271-281.
- 92 2. Xu Y, Wang L, He J, et al. Prevalence and control of diabetes in Chinese adults.  
93 *JAMA.* 2013;310(9):948-959.
- 94 3. Shen XX, Wang JP, Chen YY, et al. [Subjects with impaired glucose tolerance  
95 returned to normal glucose status for six years had lower long-term risk of diabetes:  
96 20 years follow up of Daqing diabetes prevention study]. *Zhonghua Nei Ke Za Zhi.*  
97 2019;58(5):372-376.
- 98 4. Baum A, Scarpa J, Bruzelius E, Tamler R, Basu S, Faghmous J. Targeting weight  
99 loss interventions to reduce cardiovascular complications of type 2 diabetes: a  
100 machine learning-based post-hoc analysis of heterogeneous treatment effects in the  
101 Look AHEAD trial. *Lancet Diabetes Endocrinol.* 2017;5(10):808-815.
- 102 5. Heilbronn LK, Smith SR, Martin CK, Anton SD, Ravussin E. Alternate-day  
103 fasting in nonobese subjects: effects on body weight, body composition, and energy  
104 metabolism. *Am J Clin Nutr.* 2005;81(1):69-73.
- 105 6. Li G, Xie C, Lu S, et al. Intermittent Fasting Promotes White Adipose Browning

106 and Decreases Obesity by Shaping the Gut Microbiota. *Cell Metab.*  
107 2017;26(4):672-685 e674.

108 7. Lopez-Lluch G, Navas P. Calorie restriction as an intervention in ageing. *J*  
109 *Physiol.* 2016;594(8):2043-2060.

110 8. Qiu X, Brown K, Hirschey MD, Verdin E, Chen D. Calorie restriction reduces  
111 oxidative stress by SIRT3-mediated SOD2 activation. *Cell Metab.*  
112 2010;12(6):662-667.

113 9. Malinowski B, Zalewska K, Wesierska A, et al. Intermittent Fasting in  
114 Cardiovascular Disorders-An Overview. *Nutrients.* 2019;11(3).

115

## 116 **II. Research objectives:**

117 To prospectively compare the effects of intermittent fasting meal replacement,  
118 metformin, and SGLT-2 inhibitor empagliflozin on blood glucose levels in  
119 overweight and obese patients with newly diagnosed type 2 diabetes. The  
120 secondary objectives of this study are to observe the proportion of patients with  
121 a reduction in glycosylated hemoglobin of greater than 0.4%, effectiveness  
122 (body weight/blood lipids/blood pressure/uric acid/islet function), compliance,  
123 and safety in the three treatment modes.

124

## 125 **III. Research content:**

126 A total of 405 overweight and obese patients with newly diagnosed type 2 diabetes  
127 who meet the inclusion and exclusion criteria will be selected and enrolled in the  
128 study after obtaining informed consent. The participants will be randomly divided into  
129 three groups: 5:2 MR group, metformin group, and empagliflozin group, in a ratio of  
130 1:1:1. The intervention will last for 16 weeks, with follow-up visits every 4 weeks  
131 during the study period. Data on blood pressure, body weight, and body  
132 circumference will be recorded. Metabolic indicators such as blood glucose, blood  
133 lipids, uric acid, glycosylated hemoglobin, and insulin resistance index will be  
134 measured at baseline and at week 16. After week 16, all participants will no longer

135 receive intervention measures from this study, and whether to continue conventional  
136 hypoglycemic treatment will be determined by the researchers based on the patient's  
137 current condition. Telephone follow-up will be conducted at week 20 to collect data  
138 on blood pressure, body weight, body circumference, fasting and postprandial blood  
139 glucose levels. At week 24, changes in glycosylated hemoglobin, fasting blood  
140 glucose, blood lipids, urine routine, and body weight will be evaluated in all three  
141 groups.

142

#### 143 **IV. Research design and implementation plan**

##### 144 **1. Study Subject Selection (Inclusion Criteria, Exclusion Criteria)**

145 1) Inclusion Criteria: Participants must meet all of the following criteria to be  
146 eligible for inclusion: aged between 18 and 65 years old, diagnosed with type 2  
147 diabetes according to the WHO (1999) diagnostic criteria, diabetes duration  $\leq 1$   
148 year and no use of hypoglycemic drugs in the past 3 months,  $BMI \geq 25 \text{kg/m}^2$ ,  
149  $HbA_{1C} \geq 9.0\%$  and  $HbA_{1C} \geq 7.0\%$ , stable weight (weight fluctuation within 5% in  
150 the previous 3 months), signed informed consent form and adhere to the study  
151 protocol.

152 2) Exclusion Criteria: If any of the following exclusion criteria are met, participants  
153 will not be included in this study. Diabetes other than clinically diagnosed type 2  
154 diabetes; acute metabolic complications within 6 months prior to screening, including  
155 lactic acidosis, nonketotic hyperosmolar coma, diabetic ketoacidosis; severe acute or  
156 chronic complications of diabetes (such as myocardial infarction, stroke, congestive  
157 heart failure, blindness caused by diabetic retinopathy, renal failure, and severe foot  
158 ulcers); other endocrine diseases besides type 2 diabetes that are being treated and not  
159 controlled; hypoglycemia prone according to the investigator's judgment; taking  
160 weight-affecting medications (such as orlistat, glucocorticoids) or appetite and  
161 gastrointestinal motility-affecting medications in the past 3 months; severe liver  
162 function damage ( $ALT \geq 3ULN$ ); recurrent urinary or reproductive system infections in  
163 the recent past; severe renal dysfunction ( $eGFR \leq 60 \text{ml/min/1.73m}^2$ ); heart failure

164 (NYHA III-IV stage); severe blood system diseases (such as thalassemia, iron  
165 deficiency anemia); alcohol consumption equivalent to >140 g/week of ethanol (>70  
166 g/week for women); mental illness unable to cooperate with the trial; unable to eat by  
167 mouth; history of gastrointestinal surgery; intolerant or allergic to meal replacement  
168 component; allergic to metformin or empagliflozin; pregnant and breastfeeding  
169 women; history of tumors within the past 5 years.

## 170 **2. Study Design (Research Type, Control Method, Randomization and Blinding** 171 **Level)**

172 This study is a prospective intervention study, where the participants will be randomly  
173 assigned to the intermittent fasting group, metformin group, and empagliflozin group  
174 after enrollment, with a 1:1:1 ratio. The intermittent fasting group serves as the  
175 intervention group, while the metformin group and empagliflozin group serve as  
176 control groups. No blinding will be applied among the three groups.

## 177 **3. Research Process and Follow-up Plan**

178 3.1 Baseline Period: The measurement of patients' vital signs and body circumference  
179 indicators includes blood pressure, height, weight, waist circumference, hip  
180 circumference, etc. In the fasting state, the blood routine, liver and kidney function,  
181 glucose, lipids, uric acid and other biochemical indicators, glycosylated hemoglobin  
182 will be detected. The standard meal will be used to evaluate the insulin function and  
183 insulin resistance status of the subjects. Urine routine examination will also be  
184 performed. Patients will be randomly assigned to the intermittent fasting group,  
185 metformin group, and empagliflozin group according to a 1:1:1 ratio.

186 ● **5:2 MR Group:** A meal replacement package will be provided. The specific plan  
187 is to select two non-consecutive days within a week (such as Monday and  
188 Thursday, or Tuesday and Friday, etc.) to replace three meals with Anti-Diet  
189 King™ Cereal Fruit Vegetable Meal Package No. 2 (A) (94kcal/package 20g,  
190 100g meal replacement package A contains protein 17.2g accounting for 29%, fat  
191 19g accounting for 32%, carbohydrates 57.6g accounting for 19%, sodium  
192 368mg). For these two days, the dietary plan is breakfast of one egg + meal

193 replacement package A, lunch of 100g low-sugar fruits (such as cucumber,  
194 tomato, orange, etc.) + meal replacement package A, and dinner of 200-400g  
195 leafy greens (such as spinach, cabbage, etc.) + meal replacement package A. For  
196 the remaining five days of the week, breakfast and lunch are normal diets (low oil  
197 and sugar recommended), and dinner is replaced with Anti-Diet King™ Cereal  
198 Fruit Vegetable Meal Package No. 5 (B) (88kcal/package 20g, 100g meal  
199 replacement package B contains protein 19.7 g accounting for 33%, fat 11.4 g  
200 accounting for 19%, carbohydrates 63.4g accounting for 21%, sodium 349mg).

201 ● **Metformin Group:** The starting dose is 0.5g per time, twice a day, and gradually  
202 increased to the maximum tolerated dose of 0.5g per time, 2 to 4 times a day  
203 (1g-2g/day).

204 ● **Empagliflozin Group:** Empagliflozin will be given once daily, 10mg per time.

205 The researchers will provide glucose recording diaries and dietary exercise recording  
206 diaries to the participants in all three groups.

207 3.2 Intervention Period:

208 ● **Follow-up at Week 4, Week 8, and Week 12:** The participants' blood glucose  
209 record books and dietary exercise diaries will be collected. The physician will  
210 assess the participants' blood glucose status and measure their vital signs and  
211 body circumference indicators, including blood pressure, height, weight, waist  
212 circumference, hip circumference, etc., and record any medication side effects  
213 such as gastrointestinal reactions, urinary/reproductive system infections,  
214 hypoglycemia, etc. The researcher will provide new meal replacement packages  
215 or medications and distribute blood glucose record books and dietary diaries.

216 ● **Follow-up at Week 16:** The participants' blood glucose record books and dietary  
217 exercise diaries will be collected again. The physician will assess the participants'  
218 blood glucose status and measure their vital signs and body circumference  
219 indicators, including blood pressure, height, weight, waist circumference, hip  
220 circumference, etc., and record any medication side effects such as  
221 gastrointestinal reactions, urinary/reproductive system infections, hypoglycemia,



222 etc. The researcher will provide new meal replacement packages or medications  
223 and distribute blood glucose record books and dietary diaries. The participants  
224 will undergo fasting blood tests for liver and kidney function, blood glucose,  
225 lipids, uric acid, glycosylated hemoglobin, and urine routine examination to  
226 evaluate their pancreatic function and insulin resistance status with a standard  
227 meal.

228 3.3 Follow-up Period (Week 16 to Week 24): After Week 16, all participants will no  
229 longer receive the intervention measures of this study. Whether to continue with  
230 regular blood sugar lowering treatment will be determined by the researcher based on  
231 the patient's current condition. The researcher will conduct a telephone visit at Week  
232 20 to record the participants' weight, waist circumference, hip circumference, blood  
233 pressure, blood glucose, and other indicators. At Week 24, all three groups of  
234 participants will return to the hospital for a follow-up visit. The physician will assess  
235 the participants' blood glucose status and measure their vital signs and body  
236 circumference indicators, including blood pressure, height, weight, waist  
237 circumference, hip circumference, etc. Fasting blood tests will be conducted to  
238 evaluate liver and kidney function, blood glucose, lipids, uric acid, glycosylated  
239 hemoglobin, and urine routine examination.

240

241

242

243

244

245

246

247

248

249

250

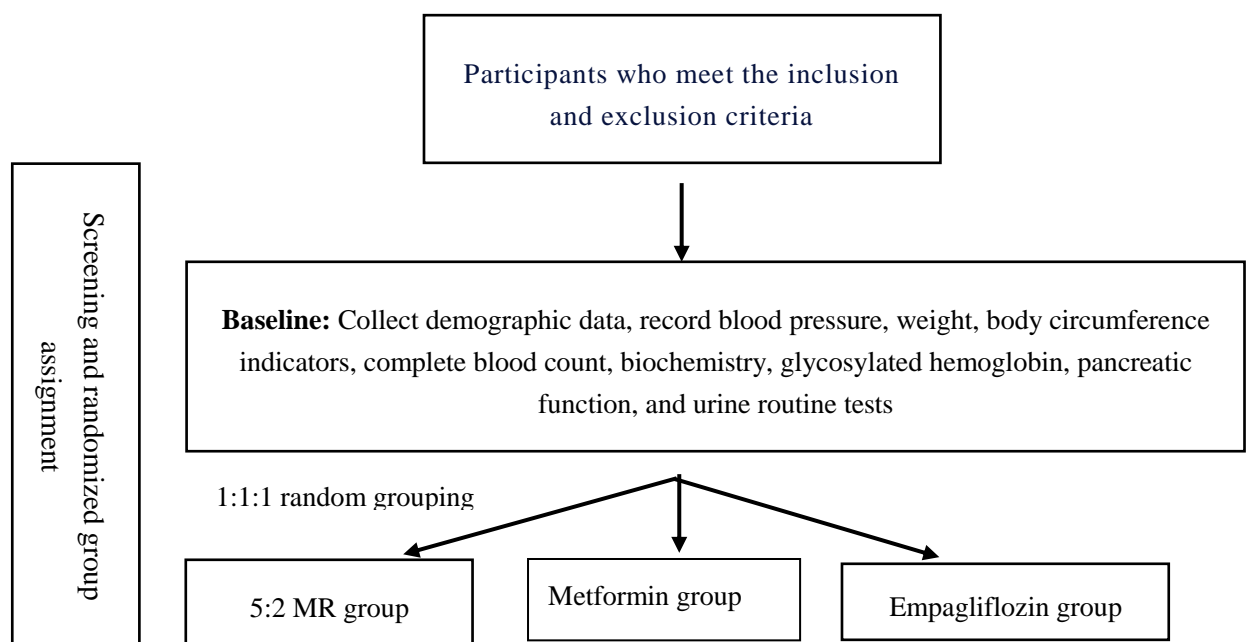

251

252

253

254

255

256

257

258

259

260

261

262

263

264

265

266

267

268

269

270

271

272

273

274

275

276

277

278

279

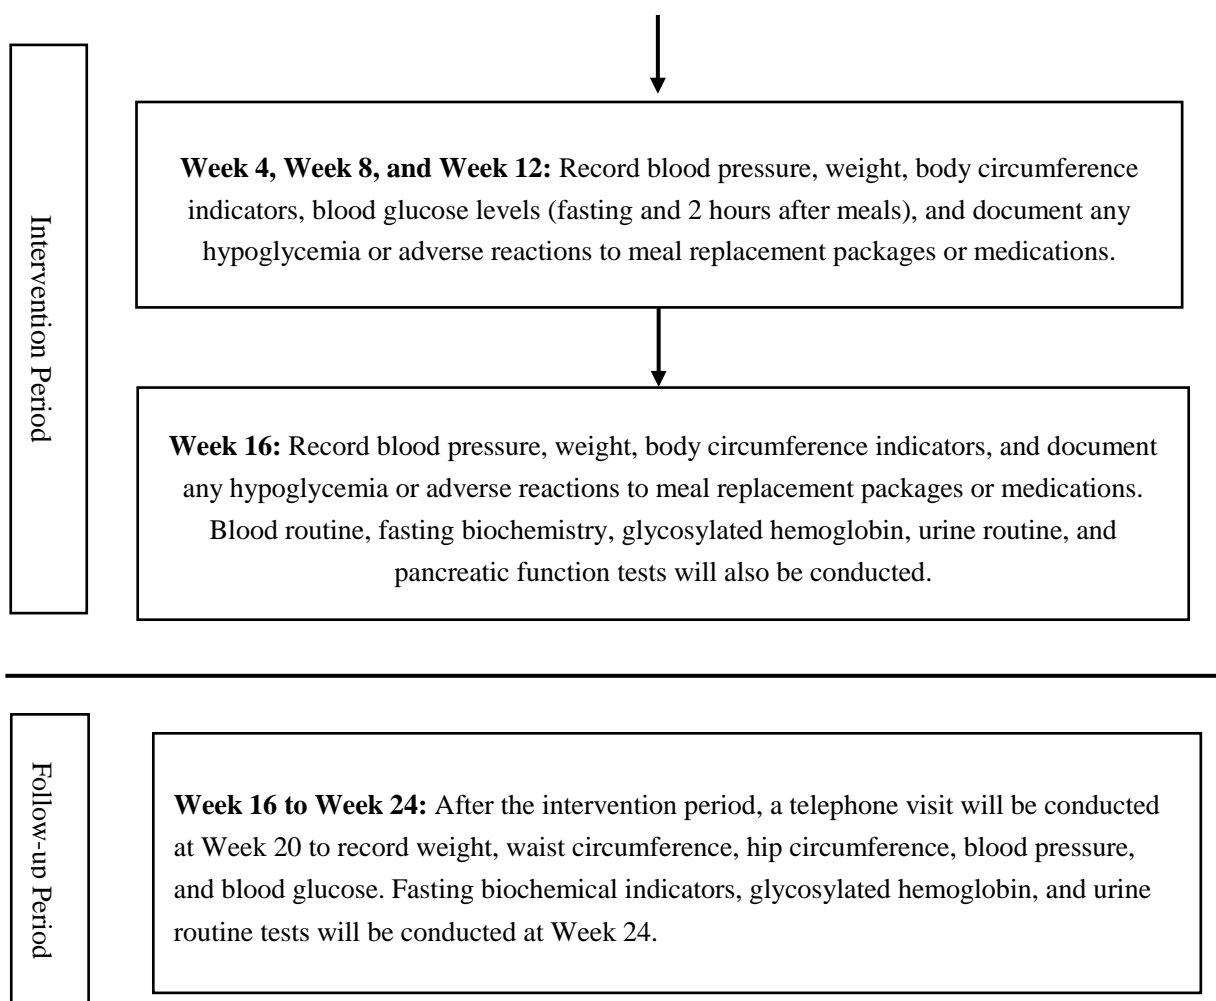

#### 4. Sample size calculation and statistical analysis methods

**Sample size calculation:** The main purpose of this study is to compare the decline in HbA1C from baseline among the three interventions. According to the literature review, the parameters set are  $\alpha=0.05$ ,  $\beta=0.19$ , the minimum acceptable difference is 0.1, the standard deviation is 0.15, and the multiple paired comparison test for quantitative data, namely the Turkey-Kramer method, will be used to calculate the sample size for the three groups. Using PASS15 software, each group requires 108 participants, a total of 324 participants. Considering a 20% dropout rate, a total of 405 participants will be needed for this study.

**Statistical methods:** Descriptive statistical analysis methods will be used, including

280 calculating the mean, standard deviation, median, minimum and maximum values for  
281 continuous variables; calculating frequency and percentage for categorical variables.  
282 The differences between the experimental group and each control group will be  
283 compared using chi-square or Fisher's exact test for categorical variables, and  
284 ANOVA or covariance analysis for continuous variables. If the data distribution does  
285 not meet the assumptions of hypothesis testing, non-parametric methods will be used.  
286 Unless otherwise specified, the statistical significance level is set at 0.05.

287 **5. Research evaluation indicators** (methods for evaluating parameters, endpoint  
288 events, recording and analysis)

289 1) Main evaluation indicators: Evaluate the amount and degree of decrease in HbA<sub>1c</sub>  
290 levels from baseline in the three study groups at Week 16.

291 2) Secondary evaluation indicators: Evaluate the proportion of participants in each  
292 group who have achieved weight loss of  $\geq 5\%$  at Week 16. Additionally, evaluate the  
293 changes in body weight, blood pressure, waist circumference, hip circumference,  
294 fasting blood glucose, 2-hour postprandial blood glucose, systolic blood pressure,  
295 lipids, uric acid, and insulin resistance status (HOMA-IR index) in the three groups at  
296 week 16.

297 **6. Other** (withdrawal criteria for participants, criteria for discontinuing the study,  
298 concomitant medication and handling of adverse events, etc.)

299 1) Withdrawal criteria: Participants can decide to withdraw from the study at any  
300 time for any reason, or their withdrawal may be decided by the researcher. Every  
301 effort should be made to record the reason for discontinuation of medication and  
302 record it in the CRF/eCRF. Reasons for termination of intervention include:  
303 significant intolerance to intermittent fasting or empagliflozin medication (AE); use of  
304 prohibited concomitant medications; other poor compliance and/or major protocol  
305 deviations; participant's desire to withdraw from the study; pregnancy or planning to  
306 become pregnant; ceasing contraception; frequent hyperglycemia or hypoglycemia,  
307 according to the researcher's judgment, the study no longer provides a positive  
308 benefit/risk ratio for the participant, and the participant needs to switch to a diabetes

309 treatment plan other than this study. Before deciding to permanently terminate the  
310 participant's study intervention treatment, any laboratory abnormal values should be  
311 immediately rechecked for confirmation.

312 2) Discontinuing Criteria: The ethics review committee or regulatory authority of  
313 the research center may terminate the study at the research center for medical, safety,  
314 regulatory, or other reasons that are consistent with applicable laws, regulations, and  
315 GCP. If the study is terminated or interrupted prematurely, the researcher will collect  
316 and retain all study records and complete as much of the CRF as possible.

317 3) Handling of adverse events: Intermittent fasting meal replacement programs may  
318 cause physical symptoms such as gastrointestinal discomfort, hunger, fatigue,  
319 headache, dizziness, hypoglycemia, and mild cognitive adverse reactions including  
320 lack of concentration. Gastrointestinal discomfort includes symptoms such as  
321 abdominal distension, abdominal pain, diarrhea, and constipation. It is recommended  
322 that participants in the intermittent fasting group ensure adequate daily water intake of  
323 at least 1500-2000ml/day. If a participant has mild discomfort that can be tolerated  
324 and does not require special treatment, no action is needed. If a participant has  
325 moderate discomfort, symptomatic treatment can be given; if severe discomfort  
326 occurs, the study should be terminated.

327 Common adverse reactions to metformin include diarrhea, nausea, vomiting,  
328 abdominal bloating, fatigue, indigestion, abdominal discomfort, and headache. Other  
329 less common adverse reactions include abnormal stools, hypoglycemia, myalgia,  
330 dizziness, nail abnormalities, rashes, increased sweating, taste abnormalities, chest  
331 discomfort, chills, flu-like symptoms, hot flashes, palpitations, and weight loss.  
332 Metformin can reduce vitamin B<sub>12</sub> absorption but rarely causes anemia. Rare cases of  
333 lactic acidosis occur within the therapeutic dose range of metformin. If a participant  
334 has significant gastrointestinal reactions, the dose of metformin can be reduced until  
335 the gastrointestinal tract adapts and then increased to the maximum tolerated dose.

336 The main adverse reactions of empagliflozin include urinary tract infections,  
337 reproductive system infections, increased urination, dysuria, blood pressure decrease,

338 elevated serum creatinine levels, rhinitis, constipation, headaches, lower extremity  
339 pain, etc. Prior to medication, participants should be informed to increase their water  
340 intake appropriately to reduce the risk of dysuria and urinary/reproductive system  
341 infections. If a participant experiences dysuria, they should undergo immediate urine  
342 routine examination. If urinary tract infection occurs, appropriate anti-infective drugs  
343 can be used. If the patient can tolerate it, medication can continue; if not, the study  
344 should be terminated.

345 4) Remedial measures during treatment: If fasting blood glucose  $\geq 10\text{mmol/L}$  and  
346 2-hour postprandial blood glucose  $\geq 13.9\text{mmol/L}$  are detected at the 8th and 12th week  
347 follow-up visits, participants in the metformin group should add empagliflozin, those  
348 in the empagliflozin group should add metformin, and those in the intermittent fasting  
349 group should add metformin. If fasting blood glucose  $\geq 13.9\text{mmol/L}$  and 2-hour  
350 postprandial blood glucose  $\geq 16.7\text{mmol/L}$  are still detected on a retest day, participants  
351 need to withdraw from the study.

352

## 353 **V. Data Management Plan**

### 354 1. Original Data Management

355 1) Researchers must ensure that the data is true, complete, and accurate;  
356 2) All items in the trial record must be filled in without any empty or missing items  
357 (blank spaces can be crossed out). Any corrections can only be made by crossing out  
358 the original text, adding a note with the revised data and the reason for the correction,  
359 and signing and dating it by the researcher. The original record cannot be erased or  
360 covered.

361 3) The laboratory examination items should be complete.

### 362 2. Data recording

363 The data related to the participants on the case report form should be recorded using  
364 the participant coding method. Participants can only be identified by their participant  
365 coding or the initials of their name.

366 Data entry: The primary researcher needs to promptly and accurately enter the data

367 from the original record form into the CRF. The CRF is not considered as the original  
368 record, and its content originates from the original case report. Another researcher  
369 should verify the consistency of the CRF data with the original record form,  
370 laboratory test results, etc. If any issues are found, they can communicate with the  
371 primary researcher at any time. The CRF will be collected and summarized by a  
372 designated person and sent to the Department of Endocrinology at Beijing Hospital.  
373 After checking and cleaning the questionnaires, a designated person will double-enter  
374 the data into the Epidata database and perform consistency checks. The CRF will be  
375 kept in a locked room under specified conditions, and non-researchers cannot access it.  
376 The electronic database will be stored on a computer with a password, and  
377 non-researchers will not have access permissions. After the study is completed, the  
378 CRF will be archived by the research institution.

379 Researchers must retain the original documents of each participant who participates in  
380 the study. All information on the case report form must come from these original  
381 documents, which should include all demographic information and treatment  
382 information, including laboratory examination data, as well as signed informed  
383 consent forms indicating the research number and title.

### 384 **3. Quality Control**

385 (1) The research institution must be a clinical research base with clinical  
386 research qualifications determined by the state.

387 (2) Researchers must be physicians who have undergone clinical training and  
388 work under the guidance of senior professionals. Standardized operating  
389 procedures are used in the study to ensure the implementation of quality control  
390 and quality assurance systems for clinical research.

391 (3) All observed results and abnormal findings during clinical research should  
392 be carefully verified and recorded in a timely manner to ensure data reliability.  
393 The recording and transfer of clinical data must be carried out by experienced  
394 physicians, supervised or checked by designated personnel, to ensure the  
395 scientificity and accuracy of the data.

396 (4) All conclusions from clinical research must be derived from original data.  
397 The responsible physician should complete, detail, and accurately fill in the  
398 CRF. After each patient is registered, the CRF should be completed as soon as  
399 possible and submitted to the superior physician for signature before being  
400 submitted or kept in accordance with the specified procedures.

401 (5) All data related to the study should be centrally managed and analyzed.  
402 Procedures for data storage, data transfer, and data retrieval should be  
403 established. The stored data includes the CRF, subject code list, and various  
404 original medical documents. The transferred data includes the CRF and  
405 summary data required for analysis.

406 (6) Supervisors and relevant hospital leaders have the right to access  
407 trial-related information and original records after obtaining consent from the  
408 principal investigator. When finalizing the entire trial report, the lead unit and  
409 primary researchers can access or review all participant data and original  
410 records after obtaining consent.

411 (7) When summarizing and analyzing the results of clinical trials, standard  
412 statistical analysis methods must be used and professional statisticians should  
413 be consulted. To ensure the reliability and completeness of trial data, the  
414 principal investigator conducts regular systematic monitoring of the clinical  
415 trial site to determine if the execution complies with the research protocol and  
416 if the reported data is consistent with the records of the participating units. Each  
417 monitoring visit and interview should be documented in a visit report.

418

## 419 **VI. Ethical issues**

420 This study will strictly follow the Declaration of Helsinki and relevant laws and  
421 regulations for ethical review in our country, and will conduct research in strict  
422 accordance with the research plan. Before the start of the study, relevant information  
423 must be submitted to the hospital ethics committee for review and approval before the  
424 study can proceed. Participants must sign an informed consent form before

425 participating in the study. During the study, any modifications to the research plan,  
426 informed consent form, etc. must be resubmitted to the hospital ethics committee for  
427 review and approval before implementation. When publishing research information  
428 and data obtained from this study at scientific conferences or in scientific journals, the  
429 identity of participants will not be disclosed.

#### 430 (1) Protective Plan for Participants

431 1) After the establishment of the research project, it must first undergo ethical review  
432 and can only proceed after approval.

433 2) Subjects will be selected based on the order of diagnosis, ensuring equal  
434 opportunities for each subject to participate in the study and minimizing selection  
435 bias.

436 3) Before the start of the study, the investigator will introduce the research purpose,  
437 content, schedule, benefits, risks, etc. in a language that the subjects can understand  
438 and comprehend.

439 4) Adequate time will be given for subjects to read or consider the contents of the  
440 informed consent form. If there are any questions, they should be raised in a timely  
441 manner. The investigator should carefully explain any questions raised by the subjects,  
442 emphasizing that their participation is entirely voluntary and they can withdraw from  
443 the study at any time without any consequences.

444 5) If a subject agrees to participate in the study, they should sign or fingerprint on the  
445 informed consent form. The investigator should also sign their name and date. If a  
446 subject is unable to sign or fingerprint, a witness should be present and sign and date,  
447 certifying that the investigator has provided truthful and complete information about  
448 the informed consent form to the subject according to its contents, and that the subject  
449 has voluntarily participated in this study.

450 6) Upon signing the informed consent form, it indicates that the subject has  
451 voluntarily participated in this study. After verification, the investigator will retain the  
452 original informed consent form while the subject may keep a copy.

#### 453 (2) Ethical Report Plan



454 This study will adhere to the Declaration of Helsinki and Good Clinical Practice  
455 (GCP) guidelines, as well as other domestic and international laws and regulations. In  
456 order to protect participants and meet ethical requirements, this study will be  
457 conducted in strict accordance with the following conditions:

458 1) Prior to the initiation of the study, it must first undergo ethical review and approval  
459 before any research can proceed.

460 2) If there are any changes to the principal investigator or modifications to the clinical  
461 trial/research protocol, informed consent form (if applicable), recruitment materials (if  
462 applicable), etc. during the course of the study, an amendment application must be  
463 submitted for review and approval by the ethics committee before implementation.

464 3) If serious adverse events occur in study participants during the course of the study,  
465 the applicant must promptly submit a serious adverse event report to the ethics  
466 committee.

467 4) If participants who do not meet the inclusion criteria or meet the exclusion criteria  
468 are included in the study, if participants are not withdrawn from the trial/study despite  
469 meeting the criteria for discontinuation, if incorrect treatment or dosages are  
470 administered, if concomitant medications prohibited by the protocol are given, or if  
471 the trial/study is not conducted in accordance with the protocol, which may have a  
472 negative impact on the rights/health of participants or the scientific integrity of the  
473 trial/study, deviating from GCP principles; in such cases, the researcher must submit a  
474 deviation report to the ethics committee.

475 5) Regular progress reports must be submitted to the ethics committee, and a final  
476 report must be submitted upon completion of the study.

477

478

479
