# Supplementary material for: A 5:2 Intermittent Fasting Meal Replacement Diet and Glycemic Control for Adults With Diabetes: The EARLY Randomized Clinical Trial
Source: PubMed Central journal article supplement (PMC11193124; doi:10.1001/jamanetworkopen.2024.16786), 2024-06-21
Supplement: jamanetwopen-e2416786-s002.pdf [file jamanetwopen-e2416786-s002.pdf]

## Supplementary Online Content

Guo L, Xi Y, Jin W, et al. A 5:2 intermittent fasting meal replacement diet and glycemic control for adults with diabetes: the EARLY randomized clinical trial. *JAMA Netw Open*. 2024;7(6):e2416786. doi:10.1001/jamanetworkopen.2024.16786

**eMethods.** Multiple Imputation

**eTable 1.** Study Centers, Location, Ethics Committee Approvals

**eTable 2.** The Contents of Dietary and Exercise Guidance, and General Diabetes Education for All Participants

**eTable 3.** Nutrition Facts of Kang Zhijun™

**eTable 4.** Changes in Primary and Secondary Outcomes From Baseline to Week 16 (Intention-to-Treat Analysis)

**eTable 5.** Unadjusted Analyses of Outcomes From Baseline to Week 16 in the Three Groups

**eTable 6.** Primary and Secondary Outcomes From Baseline to Week 16 in Three Groups (Completers Analysis)

**eTable 7.** Primary and Secondary Outcomes From Baseline to Week 24 in Three Groups (Completers Analysis)

**eFigure 1.** Study Design

**eFigure 2.** The 5:2 MR Approach

**eFigure 3.** Changes in Body Weight

**eFigure 4.** Post-Hoc Subgroup Analysis of Weight Loss at Week 16 by Intention-to-Treat Analysis

**eReference.**

This supplementary material has been provided by the authors to give readers additional information about their work.

**eMethods. Multiple Imputation**

In this study, multiple imputation was employed under the assumption of "missing at random" (MAR). This means that the probability of data being missing is unrelated to the missing values themselves but is only related to the observed data. For the imputation of continuous variables, we utilized a linear regression model. In this approach, each variable with missing data was modeled as a function of the other variables in the dataset. The linear regression model was used to estimate the relationships between the variables, and these relationships were then used to predict the missing values. Specifically, the missing value for a particular variable was estimated as a linear combination of the observed values of the other variables, with the coefficients determined by the regression model. The process of multiple imputation involves creating several imputed datasets, each with slightly different imputed values. This is done to account for the uncertainty in the imputation process. The analysis is then performed on each of these datasets separately, and the results are combined to produce a single set of estimates that reflect the variability due to missing data.

**eTable 1.** Study Centers, Location, Ethics Committee Approvals

| <b>Center</b>                                                      | <b>Location<br/>(city)</b> | <b>Ethical Approval Number</b>          | <b>Acceptance Date<br/>(mm-dd-yy)</b> |
|--------------------------------------------------------------------|----------------------------|-----------------------------------------|---------------------------------------|
| Beijing Hospital                                                   | Beijing                    | 2020BJYYEC-220-02                       | 11/13/2020                            |
| Hebei Provincial<br>People's Hospital                              | Shijiazhuang               | Research Ethics Review No.<br>60 (2021) | 04/26/2021                            |
| The Second Hospital<br>of Hebei Medical<br>University              | Shijiazhuang               | 2021-C004                               | 04/08/2021                            |
| Henan Provincial<br>People's Hospital                              | Zhengzhou                  | Research Ethics Review No.<br>86 (2021) | 06/28/2021                            |
| The First Affiliated<br>Hospital of<br>Zhengzhou<br>University     | Zhengzhou                  | TA2021-227-002                          | 08/12/2021                            |
| Nanyang Central<br>Hospital                                        | Nanyang                    | 2021-009-01                             | 05/29/2021                            |
| Sir Run Run<br>Hospital, Nanjing<br>Medical University             | Nanjing                    | 2021-IIT-001                            | 04/06/2021                            |
| The First Affiliated<br>Hospital of Soochow<br>University, Soochow | Soochow                    | 2020BJYYEC-220-02                       | 05/05/2021                            |
| The Third Affiliated<br>Hospital of Jinzhou<br>Medical University  | Jinzhou                    | JYDSY-YP-IEC-2021-001-1                 | 05/06/2021                            |

**eTable 2.** The Contents of Dietary and Exercise Guidance, and General Diabetes Education for All Participants

| Item                              | Contents <sup>1</sup>                                                                                                                                                                                                                                                                                                                                                                                                                                                                                                                                                                                                                                                                                                                                                                                                                                                                                                                                                                                                                                                                                                                                                                                                                                                                                                                                                                                                                                                                                                                                                                                                                                                                                                                                                                                                                                          |                         |                                    |  |  |      |               |         |          |       |       |    |                         |    |    |       |                            |    |    |    |                         |    |    |    |
|-----------------------------------|----------------------------------------------------------------------------------------------------------------------------------------------------------------------------------------------------------------------------------------------------------------------------------------------------------------------------------------------------------------------------------------------------------------------------------------------------------------------------------------------------------------------------------------------------------------------------------------------------------------------------------------------------------------------------------------------------------------------------------------------------------------------------------------------------------------------------------------------------------------------------------------------------------------------------------------------------------------------------------------------------------------------------------------------------------------------------------------------------------------------------------------------------------------------------------------------------------------------------------------------------------------------------------------------------------------------------------------------------------------------------------------------------------------------------------------------------------------------------------------------------------------------------------------------------------------------------------------------------------------------------------------------------------------------------------------------------------------------------------------------------------------------------------------------------------------------------------------------------------------|-------------------------|------------------------------------|--|--|------|---------------|---------|----------|-------|-------|----|-------------------------|----|----|-------|----------------------------|----|----|----|-------------------------|----|----|----|
| <b>General Diabetes Education</b> | Diabetes overview, chronic complications and comorbidities of diabetes, acute complications of diabetes, psychological stress and coping in diabetes patients.                                                                                                                                                                                                                                                                                                                                                                                                                                                                                                                                                                                                                                                                                                                                                                                                                                                                                                                                                                                                                                                                                                                                                                                                                                                                                                                                                                                                                                                                                                                                                                                                                                                                                                 |                         |                                    |  |  |      |               |         |          |       |       |    |                         |    |    |       |                            |    |    |    |                         |    |    |    |
| <b>Dietary Guidance</b>           | <p><b>I. Dietary planning</b></p> <ul style="list-style-type: none"> <li>• Calculation of Ideal Weight Ideal weight (kg) =Height (cm) -105. Within ± 10% of this value, it is within the normal range.</li> <li>• Based on ideal weight and participation in physical labor, the total daily calorie intake from food can be calculated.<br/>Daily total calorie requirement=ideal weight × The amount of calories required per kilogram of body weight.</li> <li>• Energy demand table for different physical labor <table border="1" data-bbox="763 871 1944 1206"> <thead> <tr> <th data-bbox="763 871 1146 959" rowspan="2">Physical Activity Level</th> <th colspan="3" data-bbox="1146 871 1944 919">Calories/Ideal Body Weight per Day</th> </tr> <tr> <th data-bbox="1146 919 1397 959">Lean</th> <th data-bbox="1397 919 1671 959">Normal Weight</th> <th data-bbox="1671 919 1944 959">Obesity</th> </tr> </thead> <tbody> <tr> <td data-bbox="763 959 1146 999">Bed Rest</td> <td data-bbox="1146 959 1397 999">20-25</td> <td data-bbox="1397 959 1671 999">15-20</td> <td data-bbox="1671 959 1944 999">15</td> </tr> <tr> <td data-bbox="763 999 1146 1046">Light Physical Activity</td> <td data-bbox="1146 999 1397 1046">35</td> <td data-bbox="1397 999 1671 1046">30</td> <td data-bbox="1671 999 1944 1046">20-25</td> </tr> <tr> <td data-bbox="763 1046 1146 1126">Moderate Physical Activity</td> <td data-bbox="1146 1046 1397 1126">40</td> <td data-bbox="1397 1046 1671 1126">35</td> <td data-bbox="1671 1046 1944 1126">30</td> </tr> <tr> <td data-bbox="763 1126 1146 1206">Heavy Physical Activity</td> <td data-bbox="1146 1126 1397 1206">45</td> <td data-bbox="1397 1126 1671 1206">40</td> <td data-bbox="1671 1126 1944 1206">35</td> </tr> </tbody> </table> </li> <li>• Distribution of the three nutrients</li> </ul> | Physical Activity Level | Calories/Ideal Body Weight per Day |  |  | Lean | Normal Weight | Obesity | Bed Rest | 20-25 | 15-20 | 15 | Light Physical Activity | 35 | 30 | 20-25 | Moderate Physical Activity | 40 | 35 | 30 | Heavy Physical Activity | 45 | 40 | 35 |
| Physical Activity Level           | Calories/Ideal Body Weight per Day                                                                                                                                                                                                                                                                                                                                                                                                                                                                                                                                                                                                                                                                                                                                                                                                                                                                                                                                                                                                                                                                                                                                                                                                                                                                                                                                                                                                                                                                                                                                                                                                                                                                                                                                                                                                                             |                         |                                    |  |  |      |               |         |          |       |       |    |                         |    |    |       |                            |    |    |    |                         |    |    |    |
|                                   | Lean                                                                                                                                                                                                                                                                                                                                                                                                                                                                                                                                                                                                                                                                                                                                                                                                                                                                                                                                                                                                                                                                                                                                                                                                                                                                                                                                                                                                                                                                                                                                                                                                                                                                                                                                                                                                                                                           | Normal Weight           | Obesity                            |  |  |      |               |         |          |       |       |    |                         |    |    |       |                            |    |    |    |                         |    |    |    |
| Bed Rest                          | 20-25                                                                                                                                                                                                                                                                                                                                                                                                                                                                                                                                                                                                                                                                                                                                                                                                                                                                                                                                                                                                                                                                                                                                                                                                                                                                                                                                                                                                                                                                                                                                                                                                                                                                                                                                                                                                                                                          | 15-20                   | 15                                 |  |  |      |               |         |          |       |       |    |                         |    |    |       |                            |    |    |    |                         |    |    |    |
| Light Physical Activity           | 35                                                                                                                                                                                                                                                                                                                                                                                                                                                                                                                                                                                                                                                                                                                                                                                                                                                                                                                                                                                                                                                                                                                                                                                                                                                                                                                                                                                                                                                                                                                                                                                                                                                                                                                                                                                                                                                             | 30                      | 20-25                              |  |  |      |               |         |          |       |       |    |                         |    |    |       |                            |    |    |    |                         |    |    |    |
| Moderate Physical Activity        | 40                                                                                                                                                                                                                                                                                                                                                                                                                                                                                                                                                                                                                                                                                                                                                                                                                                                                                                                                                                                                                                                                                                                                                                                                                                                                                                                                                                                                                                                                                                                                                                                                                                                                                                                                                                                                                                                             | 35                      | 30                                 |  |  |      |               |         |          |       |       |    |                         |    |    |       |                            |    |    |    |                         |    |    |    |
| Heavy Physical Activity           | 45                                                                                                                                                                                                                                                                                                                                                                                                                                                                                                                                                                                                                                                                                                                                                                                                                                                                                                                                                                                                                                                                                                                                                                                                                                                                                                                                                                                                                                                                                                                                                                                                                                                                                                                                                                                                                                                             | 40                      | 35                                 |  |  |      |               |         |          |       |       |    |                         |    |    |       |                            |    |    |    |                         |    |    |    |

|               | Recommended Energy Proportions for Daily Diet (%) | Source                                                                          |
|---------------|---------------------------------------------------|---------------------------------------------------------------------------------|
| Carbohydrates | 50%~60%                                           | Cereals, tubers, legumes, etc.                                                  |
| Protein       | 15%~20%                                           | Animal protein (various lean meats, fish, shrimp, etc.)                         |
|               |                                                   | Plant protein (soybeans and their products, cereals)                            |
| Fats          | ≤30%                                              | Saturated fatty acids, polyunsaturated fatty acids, monounsaturated fatty acids |

## II. Reasonable arrangement of meals

Diabetes patients should have at least three meals a day, so that staple food and protein are evenly distributed in the three meals, and they should be rationed regularly, generally according to 1/5, 2/5 or 1/3. For those who are prone to hypoglycemia, a small portion of staple food can be evenly distributed in the main meal as an additional meal between the two main meals. In addition to the main course, protein foods such as milk, eggs, and dried tofu can be added to the bedtime meal.

## III. Restricting alcohol consumption

## IV. Scientific selection of fruits

When the fasting blood glucose is controlled below 7.0mmol/L (126mg/dl), the postprandial blood glucose is less than 10mmol/L (180mg/dl), the glycated hemoglobin is less than 7.5%, and there is no significant fluctuation in blood glucose, fruits can be chosen. It is best to eat between two meals. Those who are not satisfied with disease control should not eat it temporarily. They can eat a small amount of raw cucumbers and tomatoes.

|                                 |                                                                                                                                                                                                                                                                                                                                                                                                                                                                                                                                                                                                                                                                                                                                                                                                                                                                                                                               |
|---------------------------------|-------------------------------------------------------------------------------------------------------------------------------------------------------------------------------------------------------------------------------------------------------------------------------------------------------------------------------------------------------------------------------------------------------------------------------------------------------------------------------------------------------------------------------------------------------------------------------------------------------------------------------------------------------------------------------------------------------------------------------------------------------------------------------------------------------------------------------------------------------------------------------------------------------------------------------|
|                                 | <p><b>V. Precautions for dietary therapy</b></p> <ul style="list-style-type: none"> <li>• Carbohydrates Sweet potatoes, potatoes, yams, taro, lotus roots and other root vegetables have a high starch content and cannot be eaten casually. They need to be exchanged with grain. Strictly limit the intake of white sugar, brown sugar, honey, jam, chocolate, various sweets, sugary drinks, ice cream and various sweet Dim sum.</li> <li>• Fat and cholesterol diabetes patients should eat less fried food. Nuts are high in fat content and should be consumed less. The daily intake of cholesterol should be less than 300 milligrams.</li> <li>• Vitamin and mineral diabetes patients can eat more fresh vegetables, and try to eat raw as much as possible to ensure the full absorption of vitamin C and other nutrients. The intake of salt should be limited to 6 grams per day.</li> </ul>                    |
| <p><b>Exercise Guidance</b></p> | <p><b>I. Preparation before exercise</b></p> <p>Before starting any exercise plan, patients undergoing a comprehensive physical examination should thoroughly screen for any potential complications, exclude potential diseases or injuries, and exclude risk factors to ensure exercise safety. Make exercise plans and discuss with doctors or full-time diabetes educators whether their physical conditions are suitable for exercise, and determine the exercise mode and amount. If blood glucose is less than 5.6 mmol/L, additional carbohydrates should be consumed before exercising.</p> <p><b>II. Exercise style, intensity, time, and frequency</b></p> <p>The exercise intensity selected by diabetes patients should be 60~70% of the maximum exercise intensity. The intensity of exercise can also be controlled based on one's feelings, that is, the whole body is hot and sweating, but not sweating</p> |

|  |                                                                                                                                                                                                                                                                                                                                                                                                                                                                                         |
|--|-----------------------------------------------------------------------------------------------------------------------------------------------------------------------------------------------------------------------------------------------------------------------------------------------------------------------------------------------------------------------------------------------------------------------------------------------------------------------------------------|
|  | <p>profusely. Patients with diabetes can choose moderate and low-intensity aerobic exercise. Exercise should be carried out about 1-2 hours after the start of a meal because blood glucose is high at this time and low blood glucose is less likely to occur during exercise. The duration of each exercise is approximately 30-60 minutes. The frequency of exercise diabetes patients should adhere to at least 3 to 4 times of moderate and low-intensity exercise every week.</p> |
|--|-----------------------------------------------------------------------------------------------------------------------------------------------------------------------------------------------------------------------------------------------------------------------------------------------------------------------------------------------------------------------------------------------------------------------------------------------------------------------------------------|

**eTable 3.** Nutrition Facts of Kang Zhijun™

|                     | Package A                                                                                                                                                                                                                                                                                                                                                                                                                                             | Package B                                                                                                                                                                                                                                                                                                                                                       |
|---------------------|-------------------------------------------------------------------------------------------------------------------------------------------------------------------------------------------------------------------------------------------------------------------------------------------------------------------------------------------------------------------------------------------------------------------------------------------------------|-----------------------------------------------------------------------------------------------------------------------------------------------------------------------------------------------------------------------------------------------------------------------------------------------------------------------------------------------------------------|
| Calories            | 94kcal per serving                                                                                                                                                                                                                                                                                                                                                                                                                                    | 88kcal per serving                                                                                                                                                                                                                                                                                                                                              |
| Weight              | 20g per serving                                                                                                                                                                                                                                                                                                                                                                                                                                       | 20g per serving                                                                                                                                                                                                                                                                                                                                                 |
| Protein             | 17.2g per100g; 29%                                                                                                                                                                                                                                                                                                                                                                                                                                    | 19.7g per 100g; 33%                                                                                                                                                                                                                                                                                                                                             |
| Fat                 | 19g per 100g; 32%                                                                                                                                                                                                                                                                                                                                                                                                                                     | 11.4g per 100g; 19%                                                                                                                                                                                                                                                                                                                                             |
| Total carbohydrates | 57.6g per 100g; 19%                                                                                                                                                                                                                                                                                                                                                                                                                                   | 63.4g per 100g; 21%                                                                                                                                                                                                                                                                                                                                             |
| Sodium              | 368mg per 100g                                                                                                                                                                                                                                                                                                                                                                                                                                        | 349mg per 100g                                                                                                                                                                                                                                                                                                                                                  |
| Ingredients         | Medium-chain triglycerides, extra virgin olive oil, sea buckthorn oil, DHA algal oil, maltodextrin, fructo-oligosaccharides, whole milk powder, soy protein powder, inulin, xylitol, sweet orange powder, cheese powder, calcium (calcium carbonate), iron (ferric pyrophosphate), zinc (zinc oxide), vitamin A, vitamin D, vitamin E, vitamin B1, vitamin B2, vitamin B6, vitamin B12, vitamin C, nicotinic acid, folic acid, food additives (casein | Grain flour (rice, soybeans, beer malt, oats, brown rice), xylitol, inulin, soy protein isolate, resistant dextrin, conjugated linoleic acid type edible vegetable oil, whey protein, kudzu powder, Chinese yam powder, goji berry powder, white kidney bean powder, food additives (casein sodium, monoglyceride and diglyceride fatty acid esters, sucralose) |



sodium, monoglyceride and diglyceride fatty acid  
esters, sucralose)

---

<sup>a</sup> One serving of Kang zhijun™ A (20g, 94 kcal, containing 11.5g carbohydrates, 3.4g protein, and 3.8g fat) was dissolved in 200ml of water to replace breakfast, lunch, and dinner.

<sup>b</sup> For the remaining five days of the week, patients followed their regular diet for breakfast and lunch, and used one serving of Kang zhijun™ B (20g dissolved in 200ml of water) to replace dinner. Each serving of meal powder B provided 88 kcal with 12.7g of carbohydrates, 3.9g of protein, and 2.3g of fat.

**eTable 4.** Changes in Primary and Secondary Outcomes from Baseline to Week 16 (Intention-to-Treat Analysis)<sup>a</sup>

|                                       | Metformin<br>(n=134) | Empagliflozin<br>(n=136) | 5:2 MR<br>(n=135) | Treatment Comparison                        |                                          |                                       |
|---------------------------------------|----------------------|--------------------------|-------------------|---------------------------------------------|------------------------------------------|---------------------------------------|
|                                       |                      |                          |                   | LSM difference (SE); 95% CI; <i>P</i> value |                                          |                                       |
|                                       |                      |                          |                   | 5:2 MR vs<br>Metformin                      | 5:2 MR vs<br>Empagliflozin               | Metformin vs<br>Empagliflozin         |
| <b>Primary endpoint</b>               |                      |                          |                   |                                             |                                          |                                       |
| HbA <sub>1c</sub> , %                 | -1.63 (0.21)         | -1.45 (0.21)             | -1.88 (0.21)      | -0.25 (0.10)<br>(-0.45, -0.06)<br>.011      | -0.43 (0.10)<br>(-0.63, -0.24)<br>.0001  | -0.18 (0.10)<br>(-0.37, 0.01)<br>.061 |
| <b>Secondary endpoints</b>            |                      |                          |                   |                                             |                                          |                                       |
| Bodyweight, kg                        | -5.5 (2.3)           | -5.8 (2.3)               | -9.7 (2.2)        | -4.2 (1.0)<br>(-6.2, -2.2)<br><.0001        | -3.9 (1.0)<br>(-5.9, -1.9)<br><.0001     | 0.3 (1.0)<br>(-1.7, 2.3)<br>.767      |
| Body mass index,<br>kg/m <sup>2</sup> | -1.82 (0.79)         | -1.96 (0.79)             | -3.35 (0.76)      | -1.53 (0.35)<br>(-2.23, -0.84)<br><.0001    | -1.39 (0.35)<br>(-2.08, -0.70)<br><.0001 | 0.14 (0.35)<br>(-0.54, 0.82)<br>.681  |
| Fasting plasma glucose,<br>mmol/L     | -1.12 (0.48)         | -1.31 (0.48)             | -1.68 (0.47)      | -0.56 (0.22)<br>(-1.00, -0.12)<br>.012      | -0.37 (0.22)<br>(-0.80, 0.07)<br>.097    | 0.19 (0.22)<br>(-0.24, 0.62)<br>.376  |
| Fasting insulin, μU/mL                | -3.78 (8.17)         | -4.58 (8.14)             | -10.69 (7.89)     | -6.90 (3.78)<br>(-14.34, 0.53)<br>.069      | -6.10 (3.77)<br>(-13.51, 1.30)<br>.106   | 0.80 (3.70)<br>(-6.48, 8.08)<br>.829  |
| Fasting C-peptide,                    | -0.28 (0.36)         | -0.35 (0.36)             | -0.6 (0.35)       | -0.32 (0.17)                                | -0.25 (0.17)                             | 0.07 (0.16)                           |

|                                    |              |              |              |               |                |               |
|------------------------------------|--------------|--------------|--------------|---------------|----------------|---------------|
| ng/mL                              |              |              |              | (-0.65, 0.01) | (-0.58, 0.08)  | (-0.25, 0.39) |
|                                    |              |              |              | .058          | .134           | .676          |
| HOMA-IR                            | -3.02 (4.22) | -3.23 (4.21) | -5.33 (4.08) | -2.30 (1.95)  | -2.09 (1.95)   | 0.21 (1.91)   |
|                                    |              |              |              | (-6.14, 1.54) | (-5.92, 1.73)  | (-3.55, 3.97) |
|                                    |              |              |              | .239          | .283           | .913          |
| Waist circumference,<br>cm         | -4.9 (2.4)   | -4.6 (2.3)   | -9.9 (2.3)   | -5.0 (1.1)    | -5.2 (1.1)     | -0.3 (1.0)    |
|                                    |              |              |              | (-7.0, -2.9)  | (-7.3, -3.2)   | (-2.3, 1.8)   |
|                                    |              |              |              | <.0001        | <.0001         | .802          |
| Hip circumference, cm              |              |              |              | -2 (1.0)      | -2.1 (1.0)     | -0.1 (0.9)    |
|                                    | -3.5 (2.1)   | -3.4 (2.1)   | -5.5 (2.1)   | (-3.9, -0.1)  | (-4.0, -0.2)   | (-1.9, 1.8)   |
|                                    |              |              |              | .038          | .031           | .94           |
| Waist-to-hip ratio                 |              |              |              | -0.03 (0.02)  | -0.04 (0.02)   | -0.01 (0.02)  |
|                                    | -0.03 (0.05) | -0.02 (0.05) | -0.06 (0.04) | (-0.07, 0.01) | (-0.08, 0.00)  | (-0.05, 0.03) |
|                                    |              |              |              | .106          | .049           | .721          |
| Systolic blood pressure,<br>mm Hg  | -1.6 (3.2)   | -2.1 (3.2)   | -6.7 (3.1)   | -5.0 (1.5)    | -4.6 (1.5)     | 0.5 (1.5)     |
|                                    |              |              |              | (-8.0, -2.1)  | (-7.5, -1.7)   | (-2.4, 3.3)   |
|                                    |              |              |              | 0.001         | .002           | .759          |
| Diastolic blood<br>pressure, mm Hg | 1.0 (2.5)    | -0.8 (2.5)   | -3.5 (2.4)   | -4.5 (1.1)    | -2.8 (1.1)     | 1.7 (1.1)     |
|                                    |              |              |              | (-6.7, -2.3)  | (-5.0, -0.5)   | (-0.5, 3.9)   |
|                                    |              |              |              | <.0001        | .015           | .126          |
| Total cholesterol,<br>mmol/L       | -0.09 (0.24) | 0.17 (0.24)  | -0.1 (0.24)  | -0.01 (0.11)  | -0.26 (0.11)   | -0.26 (0.11)  |
|                                    |              |              |              | (-0.23, 0.21) | (-0.48, -0.04) | (-0.47, 0.04) |
|                                    |              |              |              | .945          | .02            | .022          |

|                         |              |                |               |                                         |                                        |                                          |
|-------------------------|--------------|----------------|---------------|-----------------------------------------|----------------------------------------|------------------------------------------|
| Triglycerides, mmol/L   | -0.13 (0.48) | -0.12 (0.48)   | -0.74 (0.46)  | -0.6 (0.22)<br>(-1.04, -0.17)<br>.007   | -0.62 (0.22)<br>(-1.05, -0.18)<br>.006 | -0.01 (0.22)<br>(-0.44, 0.42)<br>.959    |
| LDL cholesterol, mmol/L | -0.19 (0.20) | 0.03 (0.20)    | -0.11 (0.19)  | 0.08 (0.09)<br>(-0.10, 0.26)<br>.365    | -0.14 (0.09)<br>(-0.31, 0.04)<br>.128  | -0.22 (0.09)<br>(-0.39, 0.05)<br>.014    |
| HDL cholesterol, mmol/L | 0.13 (0.07)  | 0.2 (0.07)     | 0.24 (0.07)   | 0.06 (0.03)<br>(0.01, 0.11)<br>.02      | 0.06 (0.03)<br>(0.01, 0.11)<br>.024    | 0 (0.03)<br>(-0.05, 0.05)<br>.941        |
| Uric acid, mmol/L       | 9.02 (19.35) | -34.54 (19.36) | -7.03 (18.75) | -16.05 (8.96)<br>(-33.66, 1.56)<br>.074 | 27.52 (8.94)<br>(9.94, 45.09)<br>.002  | 43.56 (8.80)<br>(26.25, 60.87)<br><.0001 |

Abbreviations: HbA<sub>1c</sub>, glycated hemoglobin; HDL, high-density lipoprotein cholesterol; HOMA-IR, homeostasis model assessment of insulin resistance; LDL, low-density lipoprotein cholesterol.

Data are adjusted LSM (SE).

<sup>a</sup> The following covariates were used for adjustment in this analysis: sex, age, height, weight, family history of diabetes and hypertension, physical activity, smoking, alcohol consumption, and baseline.

**eTable 5.** Unadjusted<sup>a</sup> Analyses of Outcomes From Baseline to Week 16 in the Three Groups

|                                       | Metformin<br>(n=134) | Empagliflozin<br>(n=136) | 5:2 MR<br>(n=135) | Treatment Comparison   |                            |                               |
|---------------------------------------|----------------------|--------------------------|-------------------|------------------------|----------------------------|-------------------------------|
|                                       |                      |                          |                   | P value                |                            |                               |
|                                       |                      |                          |                   | 5:2 MR vs<br>Metformin | 5:2 MR vs<br>Empagliflozin | Metformin vs<br>Empagliflozin |
| <b>Primary endpoint</b>               |                      |                          |                   |                        |                            |                               |
| HbA <sub>1c</sub> , %                 | -1.49 (0.97)         | -1.32 (0.88)             | -1.81 (0.92)      | .017                   | <.001                      | .343                          |
| <b>Secondary endpoints</b>            |                      |                          |                   |                        |                            |                               |
| Bodyweight, kg                        | -4.1 (8.3)           | -5.0 (8.2)               | -9.6 (10.1)       | <.0001                 | <.0001                     | 1                             |
| Body mass index,<br>kg/m <sup>2</sup> | -1.46 (2.84)         | -1.78 (2.82)             | -3.39 (3.49)      | <.0001                 | <.0001                     | 1                             |
| Fasting plasma<br>glucose, mmol/L     | -1.25 (2.26)         | -1.31 (2.29)             | -1.76 (2.11)      | .181                   | .271                       | 1                             |
| Fasting insulin,<br>μU/mL             | -2.15 (30.75)        | -2.17 (35.2)             | -13.67 (42.89)    | .031                   | .03                        | 1                             |
| Fasting C-peptide,<br>ng/mL           | -0.4 (1.64)          | -0.59 (3.1)              | -0.67 (1.32)      | .935                   | 1                          | 1                             |
| HOMA-IR                               | -2.25 (16.82)        | -1.71 (19.76)            | -7.1 (23.17)      | .144                   | .083                       | 1                             |
| Waist circumference,<br>cm            | -2.3 (7.4)           | -2.0 (7.9)               | -5.0 (8.8)        | <.0001                 | <.0001                     | 1                             |
| Hip circumference,<br>cm              | -3.5 (2.1)           | -3.4 (2.1)               | -5.5 (2.1)        | .017                   | .008                       | 1                             |

|                                 |               |                |              |      |      |       |
|---------------------------------|---------------|----------------|--------------|------|------|-------|
| Waist-to-hip ratio              | -0.03 (0.16)  | -0.03 (0.18)   | -0.06 (0.17) | .474 | .322 | 1     |
| Systolic blood pressure, mm Hg  | -3.1 (14.7)   | -4.2 (14.8)    | -8.7 (13.9)  | .005 | .032 | 1     |
| Diastolic blood pressure, mm Hg | -0.7 (10.7)   | -2.6 (11.3)    | -5.6 (10.9)  | .001 | .075 | .445  |
| Total cholesterol, mmol/L       | -0.22 (0.96)  | 0.05 (1.33)    | -0.15 (0.99) | 1    | .416 | .139  |
| Triglycerides, mmol/L           | -0.23 (2.28)  | -0.14 (3.14)   | -0.56 (1.9)  | .867 | .514 | 1     |
| LDL cholesterol, mmol/L         | -0.23 (0.76)  | 0.01 (0.92)    | -0.12 (0.8)  | .868 | .511 | .046  |
| HDL cholesterol, mmol/L         | 0.09 (0.21)   | 0.1 (0.21)     | 0.14 (0.22)  | .12  | .322 | 1     |
| Uric acid, mmol/L               | 17.35 (97.21) | -33.96 (98.56) | -1.3 (97.32) | .355 | .019 | <.001 |

Abbreviations: HbA<sub>1c</sub>, glycated hemoglobin; HDL, high-density lipoprotein cholesterol; HOMA-IR, homeostasis model assessment of insulin resistance; LDL, low-density lipoprotein cholesterol.

Data are mean (SD).

<sup>a</sup> All patients in the full analysis set are included in the treatment comparisons, without adjustment for the following baseline characteristics (sex, age, height, weight, family history of diabetes and hypertension, physical activity, smoking, alcohol consumption, and baseline HbA<sub>1c</sub>).

**eTable 6.** Primary and Secondary Outcomes from Baseline to Week 16 in Three Groups (Completers Analysis)

|                                    | n   | n <sub>miss</sub> | 16 weeks     | Treatment Comparison                 |                            |                               |
|------------------------------------|-----|-------------------|--------------|--------------------------------------|----------------------------|-------------------------------|
|                                    |     |                   |              | LSM difference (SE); 95% CI; P value |                            |                               |
|                                    |     |                   |              | 5:2 MR vs<br>Metformin               | 5:2 MR vs<br>Empagliflozin | Metformin vs<br>Empagliflozin |
| <b>Primary endpoint</b>            |     |                   |              |                                      |                            |                               |
| HbA <sub>1c</sub> , %              |     |                   |              |                                      |                            |                               |
| Metformin                          | 115 | 19                | -1.65 (0.19) | -0.35 (0.1)                          | -0.56 (0.10)               | -0.21 (0.10)                  |
| Empagliflozin                      | 107 | 29                | -1.44 (0.19) | (-0.54, -0.16)                       | (-0.75, -0.36)             | (-0.40, 0.02)                 |
| 5:2 MR                             | 110 | 25                | -2.00 (0.19) | <.0001                               | <.0001                     | .03                           |
| <b>Secondary endpoints</b>         |     |                   |              |                                      |                            |                               |
| Bodyweight, kg                     |     |                   |              |                                      |                            |                               |
| Metformin                          | 114 | 20                | -4.9 (1.2)   | -6.1 (0.6)                           | -5.5 (0.6)                 | 0.6 (0.6)                     |
| Empagliflozin                      | 107 | 29                | -5.5 (1.2)   | (-7.2, -5.0)                         | (-6.65, -4.4)              | (-0.5, 1.7)                   |
| 5:2 MR                             | 110 | 25                | -11.0 (1.1)  | <.0001                               | <.0001                     | .292                          |
| Body mass index, kg/m <sup>2</sup> |     |                   |              |                                      |                            |                               |
| Metformin                          | 114 | 20                | -1.63 (0.42) | -2.18 (0.20)                         | -1.94 (0.21)               | 0.25 (0.20)                   |
| Empagliflozin                      | 107 | 29                | -1.87 (0.42) | (-2.58, -1.79)                       | (-2.34, -1.53)             | (-0.14, 0.64)                 |
| 5:2 MR                             | 110 | 25                | -3.81 (0.40) | <.0001                               | <.0001                     | .214                          |
| Fasting plasma glucose, mmol/L     |     |                   |              |                                      |                            |                               |
| Metformin                          | 112 | 23                | -1.27 (0.33) | -0.78 (0.17)                         | -0.58 (0.17)               | 0.20 (0.17)                   |
| Empagliflozin                      | 104 | 32                | -1.47 (0.33) | (-1.11, -0.45)                       | (-0.91, -0.25)             | (-0.12, 0.52)                 |

|                                 |     |    |              |                |                |               |
|---------------------------------|-----|----|--------------|----------------|----------------|---------------|
| 5:2 MR                          | 109 | 26 | -2.04 (0.32) | <.0001         | .001           | .225          |
| Waist circumference, cm         |     |    |              |                |                |               |
| Metformin                       | 113 | 21 | -4.3 (1.4)   | -7.1 (0.7)     | -6.6 (0.7)     | 0.4 (0.7)     |
| Empagliflozin                   | 107 | 28 | -4.6 (1.4)   | (-8.4, -5.8)   | (-8.0, -5.3)   | (-0.9, 1.7)   |
| 5:2 MR                          | 110 | 25 | -11.2 (1.3)  | <.0001         | <.0001         | .511          |
| Hip circumference, cm           |     |    |              |                |                |               |
| Metformin                       | 113 | 21 | -2.5 (1.1)   | -4.3 (0.5)     | -3.8 (0.5)     | -0.4 (0.5)    |
| Empagliflozin                   | 107 | 28 | -2.9 (1.1)   | (-5.3, -3.2)   | (-4.9, -2.8)   | (-0.6, 1.4)   |
| 5:2 MR                          | 110 | 25 | -6.7 (1.0)   | <.0001         | <.0001         | .40           |
| Waist-to-hip ratio              |     |    |              |                |                |               |
| Metformin                       | 113 | 21 | -0.02 (0.02) | -0.03 (0.01)   | -0.03 (0.01)   | 0.01 (0.01)   |
| Empagliflozin                   | 107 | 28 | -0.02 (0.02) | (-0.05, -0.02) | (-0.05, -0.01) | (-0.01, 0.02) |
| 5:2 MR                          | 110 | 25 | -0.05 (0.02) | .001           | .005           | .547          |
| Systolic blood pressure, mm Hg  |     |    |              |                |                |               |
| Metformin                       | 114 | 20 | -0.7 (3.0)   | -6.6 (1.5)     | -4.9 (1.6)     | 1.7 (1.5)     |
| Empagliflozin                   | 106 | 30 | -2.4 (3.1)   | (-9.6, -3.6)   | (-8.0, 1.9)    | (-1.3, 4.6)   |
| 5:2 MR                          | 110 | 25 | -7.3 (2.9)   | <.0001         | .002           | .277          |
| Diastolic blood pressure, mm Hg |     |    |              |                |                |               |
| Metformin                       | 114 | 20 | 1.3 (2.4)    | -5.3 (1.2)     | -3.2 (1.2)     | 2.1 (1.2)     |
| Empagliflozin                   | 106 | 30 | -0.8 (2.4)   | (-7.7, -2.9)   | (-5.6, -0.8)   | (-0.3, 4.4)   |
| 5:2 MR                          | 110 | 25 | -4.0 (2.3)   | <.0001         | .01            | .085          |



|                           |     |    |                |                 |                |                |
|---------------------------|-----|----|----------------|-----------------|----------------|----------------|
| Total cholesterol, mmol/L |     |    |                |                 |                |                |
| Metformin                 | 112 | 22 | -0.07 (0.23)   | -0.09 (0.12)    | -0.35 (0.12)   | -0.26 (0.12)   |
| Empagliflozin             | 105 | 31 | 0.19 (0.23)    | (-0.33, 0.14)   | (-0.59, -0.12) | (-0.49, -0.03) |
| 5:2 MR                    | 109 | 26 | -0.16 (0.22)   | .424            | .004           | .028           |
| Triglycerides, mmol/L     |     |    |                |                 |                |                |
| Metformin                 | 112 | 22 | -0.15 (0.43)   | -0.92 (0.22)    | -0.92 (0.22)   | -0.01 (0.22)   |
| Empagliflozin             | 105 | 31 | -0.15 (0.43)   | (-1.35, -0.49)  | (-1.36, -0.49) | (-0.43, 0.42)  |
| 5:2 MR                    | 109 | 26 | -1.07 (0.42)   | <.0001          | <.0001         | .982           |
| LDL cholesterol, mmol/L   |     |    |                |                 |                |                |
| Metformin                 | 112 | 22 | -0.15 (0.19)   | 0.04 (0.10)     | -0.12 (0.10)   | -0.16 (0.10)   |
| Empagliflozin             | 105 | 31 | 0.02 (0.20)    | (-0.15, 0.24)   | (-0.32, 0.08)  | (-0.35, 0.03)  |
| 5:2 MR                    | 109 | 26 | -0.10 (0.19)   | .673            | .23            | .097           |
| HDL cholesterol, mmol/L   |     |    |                |                 |                |                |
| Metformin                 | 112 | 22 | 0.12 (0.05)    | 0.07 (0.02)     | 0.06 (0.03)    | -0.01 (0.02)   |
| Empagliflozin             | 105 | 31 | 0.13 (0.05)    | (0.02, 0.12)    | (0.01, 0.11)   | (-0.05, 0.04)  |
| 5:2 MR                    | 109 | 26 | 0.19 (0.05)    | .005            | .013           | .802           |
| Uric acid, mmol/L         |     |    |                |                 |                |                |
| Metformin                 | 112 | 22 | 12.64 (20.30)  | -24.64 (10.26)  | 35.45 (10.49)  | 60.08 (10.22)  |
| Empagliflozin             | 105 | 31 | -47.45 (20.45) | (-44.83, -4.45) | (14.81, 56.08) | (39.98, 80.19) |
| 5:2 MR                    | 109 | 26 | -12.00 (19.62) | .017            | .001           | <.0001         |

Abbreviations: HbA<sub>1c</sub>, glycated hemoglobin; HDL, high-density lipoprotein cholesterol; LDL, low-density lipoprotein cholesterol.

Data are LSM (SE).

**eTable 7.** Primary and Secondary Outcomes from Baseline to Week 24 in Three Groups (Completers Analysis)

|                                    | n  | n <sub>miss</sub> | 24 weeks     | Treatment Comparison                 |                            |                               |
|------------------------------------|----|-------------------|--------------|--------------------------------------|----------------------------|-------------------------------|
|                                    |    |                   |              | LSM difference (SE); 95% CI; P value |                            |                               |
|                                    |    |                   |              | 5:2 MR vs<br>Metformin               | 5:2 MR vs<br>Empagliflozin | Metformin vs<br>Empagliflozin |
| <b>Primary endpoint</b>            |    |                   |              |                                      |                            |                               |
| HbA <sub>1c</sub> , %              |    |                   |              |                                      |                            |                               |
| Metformin                          | 96 | 38                | -1.32 (0.20) | -0.56 (0.11)                         | -0.66 (0.11)               | -0.10 (0.11)                  |
| Empagliflozin                      | 87 | 49                | -1.22 (0.20) | (-0.78, -0.35)                       | (-0.88, -0.45)             | (-0.31, 0.11)                 |
| 5:2 MR                             | 94 | 41                | -1.88 (0.19) | <.0001                               | <.0001                     | .36                           |
| <b>Secondary endpoints</b>         |    |                   |              |                                      |                            |                               |
| Bodyweight, kg                     |    |                   |              |                                      |                            |                               |
| Metformin                          | 97 | 37                | -4.0 (1.4)   | -5.5 (0.7)                           | -4.8 (0.8)                 | 0.6 (0.7)                     |
| Empagliflozin                      | 88 | 48                | -4.6 (1.4)   | (-6.9, -4.0)                         | (-6.3, -3.4)               | (-0.8, 2.0)                   |
| 5:2 MR                             | 92 | 43                | -9.4 (1.3)   | <.0001                               | <.0001                     | .407                          |
| Body mass index, kg/m <sup>2</sup> |    |                   |              |                                      |                            |                               |
| Metformin                          | 97 | 37                | -1.99 (0.99) | -1.16 (0.51)                         | -1.82 (0.53)               | -0.66 (0.51)                  |
| Empagliflozin                      | 88 | 48                | -1.33 (1.00) | (-2.17, -0.15)                       | (-2.86, -0.77)             | (-1.67, 0.34)                 |
| 5:2 MR                             | 92 | 43                | -3.15 (0.95) | .025                                 | .001                       | .193                          |
| Fasting plasma glucose, mmol/L     |    |                   |              |                                      |                            |                               |
| Metformin                          | 96 | 38                | -0.80 (0.35) | -1.07 (0.19)                         | -0.70 (0.19)               | 0.37 (0.19)                   |

|                                 |    |    |              |                |               |               |
|---------------------------------|----|----|--------------|----------------|---------------|---------------|
| Empagliflozin                   | 86 | 50 | -1.17 (0.35) | (-1.44, -0.70) | (-1.08, 0.32) | (0, 0.74)     |
| 5:2 MR                          | 94 | 41 | -1.87 (0.33) | <.0001         | <.0001        | .051          |
| Waist circumference, cm         |    |    |              |                |               |               |
| Metformin                       | 97 | 37 | -4.3 (1.6)   | -6.4 (0.8)     | -5.9 (0.8)    | 0.6 (0.8)     |
| Empagliflozin                   | 88 | 48 | -4.9 (1.6)   | (-8.0, -4.8)   | (-7.4, -4.2)  | (-1.0, 2.2)   |
| 5:2 MR                          | 91 | 44 | -10.7 (1.5)  | <.0001         | <.0001        | .435          |
| Hip circumference, cm           |    |    |              |                |               |               |
| Metformin                       | 97 | 37 | -2.4 (1.1)   | -3.8 (0.6)     | -4.2 (0.6)    | -0.5 (0.6)    |
| Empagliflozin                   | 88 | 48 | -2.0 (1.1)   | (-4.9, -2.6)   | (-5.4, -3.0)  | (-1.6, 0.7)   |
| 5:2 MR                          | 91 | 44 | -6.2 (1.1)   | <.0001         | <.0001        | .445          |
| Waist-to-hip ratio              |    |    |              |                |               |               |
| Metformin                       | 97 | 37 | -0.03 (0.03) | -0.02 (0.02)   | -0.03 (0.02)  | -0.01 (0.02)  |
| Empagliflozin                   | 88 | 48 | -0.02 (0.03) | (-0.05, 0.01)  | (-0.07, 0.00) | (-0.04, 0.02) |
| 5:2 MR                          | 91 | 44 | -0.05 (0.03) | .181           | .056          | .515          |
| Systolic blood pressure, mm Hg  |    |    |              |                |               |               |
| Metformin                       | 97 | 37 | -11.5 (3.4)  | -6.0 (1.9)     | -3.1 (1.9)    | 2.9 (1.9)     |
| Empagliflozin                   | 86 | 50 | -14.4 (3.4)  | (-9.6, -2.3)   | (-6.8, 0.7)   | (-0.8, 6.5)   |
| 5:2 MR                          | 92 | 43 | -17.4 (3.3)  | .001           | .107          | .123          |
| Diastolic blood pressure, mm Hg |    |    |              |                |               |               |
| Metformin                       | 97 | 37 | -2.8 (2.3)   | -3.7 (1.2)     | -3.1 (1.3)    | 0.63 (1.22)   |
| Empagliflozin                   | 86 | 50 | -3.4 (2.3)   | (-6.1, -1.3)   | (-5.6, -0.6)  | (-1.78, 3.03) |
| 5:2 MR                          | 92 | 43 | -6.5 (2.2)   | .003           | .015          | .609          |

|                           |    |    |               |                |                 |                 |
|---------------------------|----|----|---------------|----------------|-----------------|-----------------|
| Total cholesterol, mmol/L |    |    |               |                |                 |                 |
| Metformin                 | 96 | 38 | 0.03 (0.23)   | -0.19 (0.13)   | -0.36 (0.13)    | -0.18 (0.13)    |
| Empagliflozin             | 87 | 49 | 0.20 (0.24)   | (-0.44, 0.07)  | (-0.62, -0.11)  | (-0.43, 0.08)   |
| 5:2 MR                    | 94 | 41 | -0.16 (0.22)  | .146           | .006            | .169            |
| Triglycerides, mmol/L     |    |    |               |                |                 |                 |
| Metformin                 | 96 | 38 | -0.06 (0.52)  | -0.80 (0.28)   | -0.68 (0.29)    | 0.12 (0.29)     |
| Empagliflozin             | 87 | 49 | -0.17 (0.53)  | (-1.36, -0.26) | (-1.26, -0.11)  | (-0.45, 0.68)   |
| 5:2 MR                    | 94 | 41 | -0.86 (0.50)  | .005           | .019            | .685            |
| LDL cholesterol, mmol/L   |    |    |               |                |                 |                 |
| Metformin                 | 95 | 39 | 0.02 (0.21)   | -0.15 (0.11)   | -0.18 (0.12)    | -0.03 (0.11)    |
| Empagliflozin             | 86 | 50 | 0.06 (0.21)   | (-0.37, 0.07)  | (-0.40, 0.05)   | (-0.25, 0.19)   |
| 5:2 MR                    | 94 | 41 | -0.12 (0.20)  | .192           | .122            | .78             |
| HDL cholesterol, mmol/L   |    |    |               |                |                 |                 |
| Metformin                 | 95 | 39 | 0.13 (0.05)   | 0.09 (0.03)    | 0.05 (0.03)     | -0.04 (0.03)    |
| Empagliflozin             | 86 | 50 | 0.17 (0.05)   | (0.04, 0.15)   | (0, 0.11)       | (-0.09, 0.01)   |
| 5:2 MR                    | 94 | 41 | 0.22 (0.05)   | .001           | .056            | .13             |
| Uric acid, mmol/L         |    |    |               |                |                 |                 |
| Metformin                 | 96 | 38 | 14.15 (19.18) | -13.04 (10.39) | -4.44 (10.66)   | 8.60 (10.47)    |
| Empagliflozin             | 87 | 39 | 5.55 (19.34)  | (-33.50, 7.42) | (-25.43, 16.55) | (-12.02, 29.22) |
| 5:2 MR                    | 94 | 41 | 1.11 (18.41)  | .211           | .678            | .412            |

Abbreviations: HbA<sub>1c</sub>, glycated hemoglobin; HDL, high-density lipoprotein cholesterol; LDL, low-density lipoprotein cholesterol.

Data are LSM (SE).

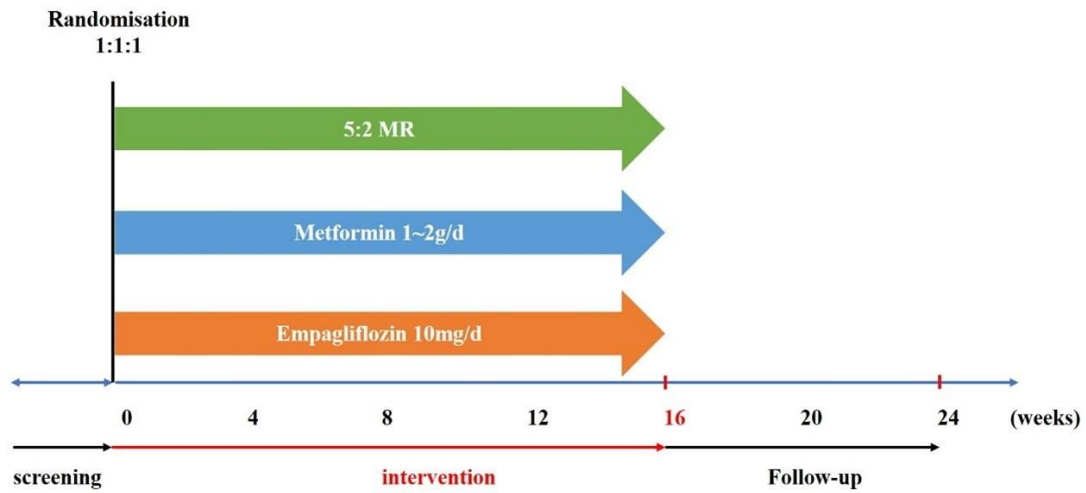

**eFigure 1. Study design.** Participants were randomly assigned to the metformin, empagliflozin, or 5:2 MR groups for a 16-week treatment. After the 16-week treatment, the participants in all three groups underwent an additional 8-week follow-up without any intervention, i.e., the final visit was conducted at week 24.

| 5:2 intermittent fasting meal replacement diet Group (5+2 MR)                     |                                                                                                                                                                                                             |                                                                                                                                                                     |
|-----------------------------------------------------------------------------------|-------------------------------------------------------------------------------------------------------------------------------------------------------------------------------------------------------------|---------------------------------------------------------------------------------------------------------------------------------------------------------------------|
|                                                                                   | On the 2 light fasting days                                                                                                                                                                                 | On the 5 non-fasting days:                                                                                                                                          |
|  | <br>1 egg + one serving Kang Zhijun™ A                                                                                     | <br>Regular meals                                                                 |
|  | <br>100g of low-carbohydrate fruits or vegetables (such as cucumber, tomatoes, oranges, etc.) + one serving Kang Zhijun™ A | <br>Regular meals                                                                 |
|  | <br>200~400g of green leafy vegetables (such as spinach, cabbage, etc.) + one serving Kang Zhijun™ A                       | <br>one serving Kang Zhijun™ B instead of carbohydrate-rich foods+<br>Other foods |

**eFigure 2. The 5:2 MR approach.** Participants are required to choose 2 non-consecutive days within a week (such as Monday and Thursday, or Tuesday and Friday) to replace all three meals with Kang zhijun™ A. The dietary plan for these two days is as follows as example: one egg for breakfast + Kang zhijun™ A, 100g of low-sugar fruit (such as cucumber, tomato and orange) for lunch + Kang zhijun™ A, and 200-400g of green leafy vegetables (such as spinach and cabbage) for dinner + Kang zhijun™ A. The specified total daily energy intake is 500 kcal for females and 600 kcal for males per day. For the remaining 5 days of the week, breakfast and lunch should be regular meals (less intake of oil and sugar is recommended), and dinner will be replaced with Kang zhijun™ B.

**A**

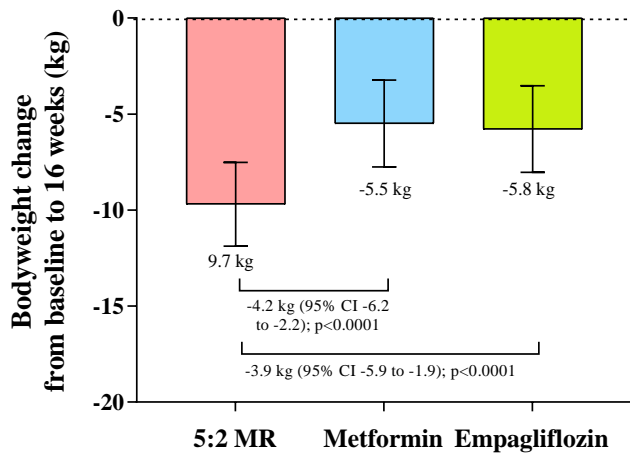

**B**

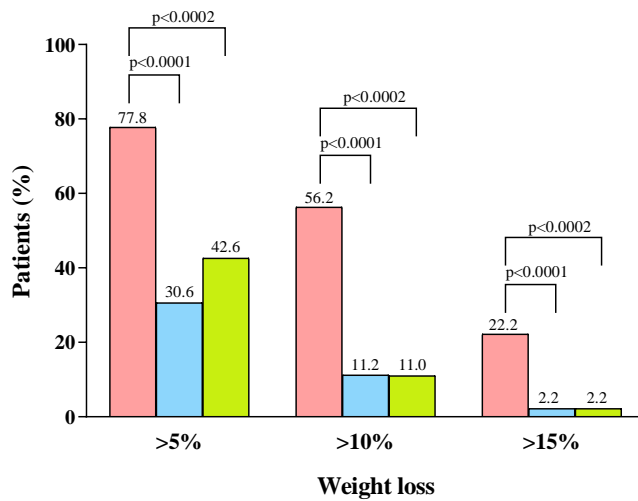

**eFigure 3. Changes in Body Weight.** (A) Changes in body weight from baseline to 16 weeks. (B) Proportions of patients with 5%, 10%, and 15% weight loss in all three groups.

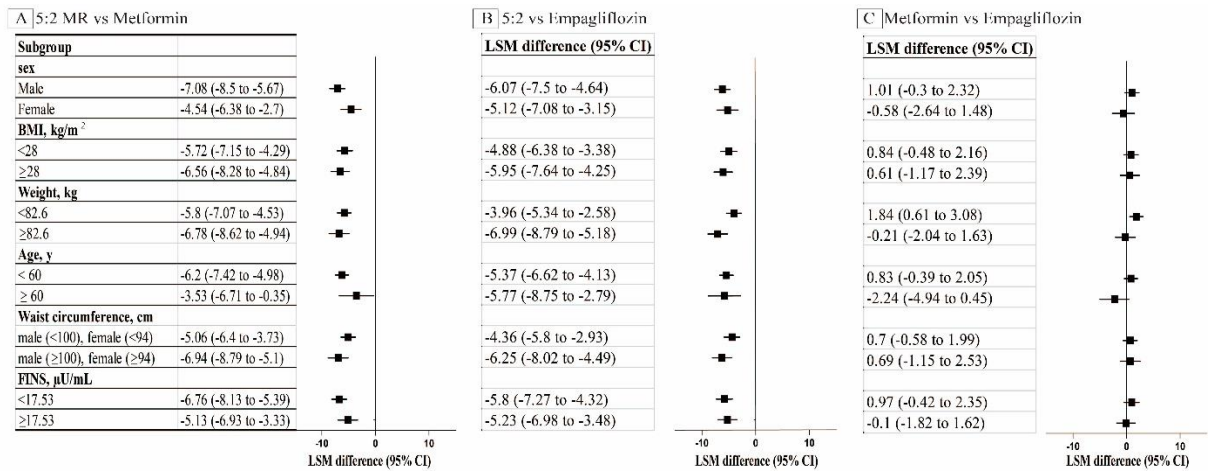

**Figure 4. Post-Hoc Subgroup Analysis of Weight Loss at Week 16 by Intention-to-Treat Analysis.** Patients were randomized to receive 5:2MR (n=135), metformin (n=134) and empagliflozin (n=136). Subgroups are categorized by sex (male, female), BMI ( $\geq 24$ ,  $< 28$  kg/m<sup>2</sup>,  $\geq 28$  kg/m<sup>2</sup>), weight ( $< 82.6$  kg,  $\geq 82.6$  kg), age ( $< 60$  years,  $\geq 60$  years), waist circumference (male:  $< 100$  cm,  $\geq 100$  cm; female:  $< 94$  cm,  $\geq 94$  cm), and fasting insulin ( $\leq 17.53$   $\mu$ U/ml,  $> 17.53$   $\mu$ U/ml).



**eReference.**

1. Dai X, Deng WP, Dong YX, et al. China Diabetes Care and Education Guidelines. <https://diab.cma.org.cn/UploadFile/Ueditor/file/20160811/6360650900034000003924937.pdf>
