# Supplementary material for: A 5:2 Intermittent Fasting Meal Replacement Diet and Glycemic Control for Adults With Diabetes: The EARLY Randomized Clinical Trial
Source: PubMed Central journal article supplement (PMC11193124; doi:10.1001/jamanetworkopen.2024.16786), 2024-06-21
Supplement: jamanetwopen-e2416786-s003.pdf [file jamanetwopen-e2416786-s003.pdf]

## Data Sharing Statement

Guo. A 5:2 Intermittent Fasting Meal Replacement Diet and Glycemic Control for Adults With Diabetes. *JAMA Netw Open*. Published June 21, 2024.

doi:10.1001/jamanetworkopen.2024.16786

### Data

**Data available:** Yes

**Data types:** Deidentified participant data

**How to access data:** Requests for data can be sent to [glx1218@163.com](mailto:glx1218@163.com)

**When available:** With publication

### Supporting Documents

**Document types:** None

### Additional Information

**Who can access the data:** Researchers whose proposed use of the data has been approved.

**Types of analyses:** For any research purpose

**Mechanisms of data availability:** With a signed Data Use Agreement.
